# Supplementary material for: Identificación de geoformas glaciales con el uso de imagen LANDSAT-7 ETM+: costa de fiordos de la Patagonia Central, Chile
Source: Oxford University Press journal article supplement (doi:10.1158/2326-6066.cir-16-0374), 2004-01-01

Fig. S1. Representative dot plots and gating strategy for Figure 1.


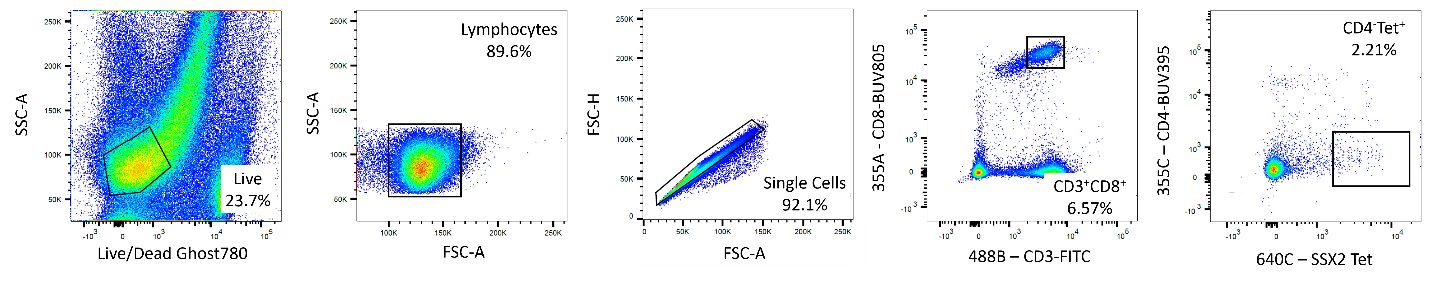


Fig. S2. Representative dot plots and gating strategy for Figure 2.


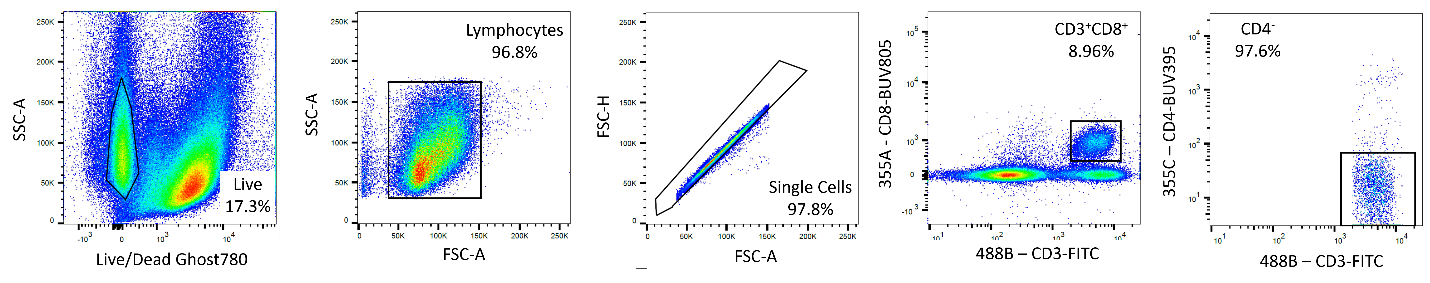


Fig. S3. Representative dot plots and gating strategy for Figure 3.


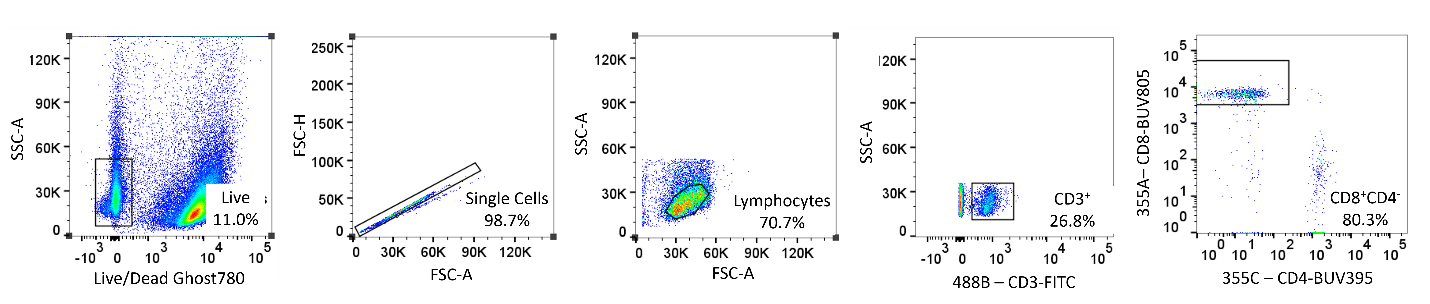


Fig. S4. Representative dot plots and gating strategy for Figure 4.


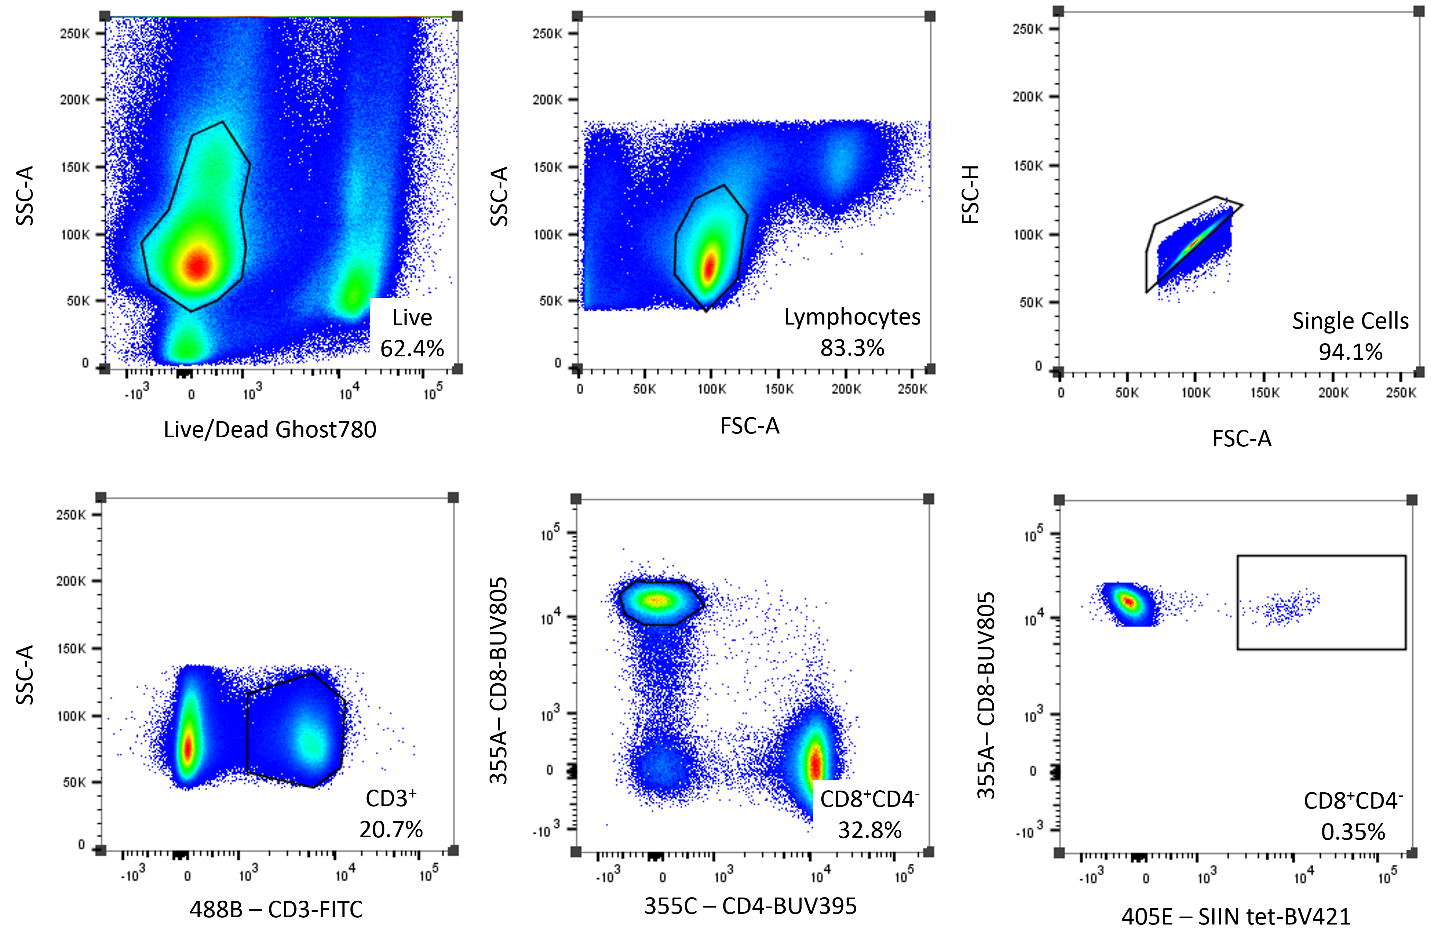


Fig. S5. Representative dot plots and gating strategy for Figure 5.


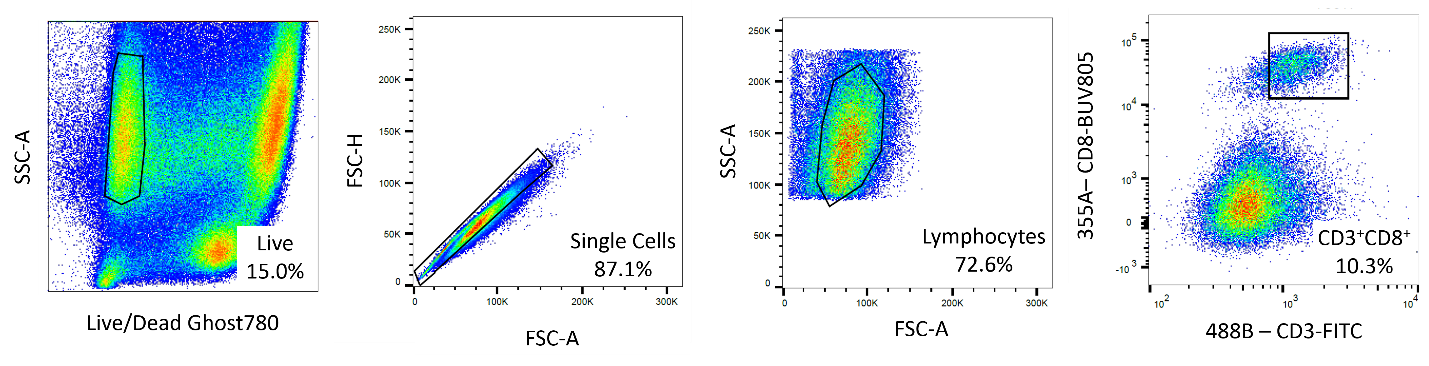


Fig. S6. Representative dot plots and gating strategy for Figure 6.


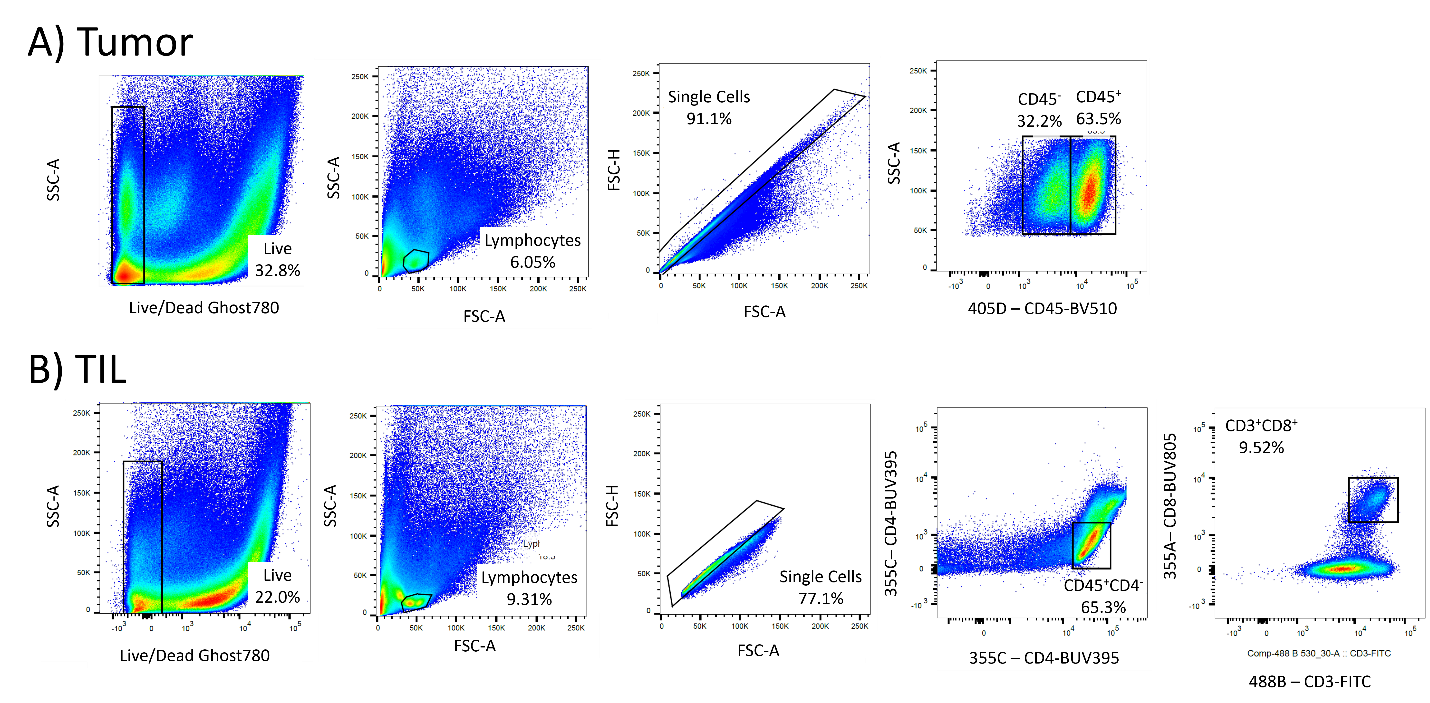

Supplement: 23266066cir160374-sup-176183_2_art_file_4093599_mrmjmr.docx [file 23266066cir160374-sup-176183_2_art_file_4093599_mrmjmr.docx]
